# Supplementary material
Source: Elsevier journal article supplement (https://www.sciencedirect.com/science/article/pii/S1697260018300954)
Supplement: mmc1 [file S1697260018300954:mmc1.docx]

**Appendix 1** Spanish version of the Orgasm Rating Scale (ORS).

Trate de recordar lo mejor posible el orgasmo más reciente que experimentó durante la relación sexual con una pareja. Puede incluir cualquier actividad sexual en la que usted tuvo un orgasmo cuando la pareja estaba presente.

¿Cómo experimentó este orgasmo con la pareja? Marque con una X una de estas casillas:

- A través de relaciones sexuales con penetración (vaginal/anal/otro)
- A través de la estimulación oral de la pareja
- A través de la estimulación manual de la pareja
- A través de la estimulación manual de usted mismo
- Otra (describa brevemente en la línea inferior (p. e., estimulación del clítoris/coito vaginal al mismo tiempo) _____________________________________________________________

A continuación, hay una lista de palabras que pueden utilizarse para describir la experiencia del orgasmo. Cada persona utiliza diferentes palabras para describir su experiencia personal, por lo que no hay una respuesta “correcta”. Al lado de cada palabra, marque el número que mejor indique cómo de bien describe esa palabra su orgasmo más reciente mediante la relación sexual con una pareja. Para valorar cada palabra, use la siguiente escala:

| 0 | 1 | 2 | 3 | 4 | 5 |
| --- | --- | --- | --- | --- | --- |
| No lo describe en absoluto |  |  |  |  | Lo describe perfectamente |
|  |  |  |  |  |  |

|  | No lo describe en absoluto |  | | | | Lo describe perfecta-mente |
| --- | --- | --- | --- | --- | --- | --- |
| Gozoso (Elated) (A) | 0 | 1 | 2 | 3 | 4 | 5 |
| Desbordante (Flooding) (S) | 0 | 1 | 2 | 3 | 4 | 5 |
| Palpitante (Pulsating) (S) | 0 | 1 | 2 | 3 | 4 | 5 |
| Satisfactorio (Satisfying) (A) | 0 | 1 | 2 | 3 | 4 | 5 |
| Incontrolable (Uncontrolled) (S) | 0 | 1 | 2 | 3 | 4 | 5 |
| Maravilloso (Blissful) (A) | 0 | 1 | 2 | 3 | 4 | 5 |
| Amoroso (Loving) (I) | 0 | 1 | 2 | 3 | 4 | 5 |
| Estremecedor (Quivering) (S) | 0 | 1 | 2 | 3 | 4 | 5 |
| Desbocado (Shooting) (S) | 0 | 1 | 2 | 3 | 4 | 5 |
| Eufórico (Euphoric) (S) | 0 | 1 | 2 | 3 | 4 | 5 |
| Sofocante (Flushing) (S) | 0 | 1 | 2 | 3 | 4 | 5 |
| Tierno (Tender) (I) | 0 | 1 | 2 | 3 | 4 | 5 |
| Íntimo (Close) (I) | 0 | 1 | 2 | 3 | 4 | 5 |
| Excitante (Exciting) (A) | 0 | 1 | 2 | 3 | 4 | 5 |
| Gratificante (Fulfilling) (A) | 0 | 1 | 2 | 3 | 4 | 5 |
| Tranquilizante (Peaceful) (R) | 0 | 1 | 2 | 3 | 4 | 5 |
| Relajante (Relaxing) (R) | 0 | 1 | 2 | 3 | 4 | 5 |
| Reconfortante (Soothing) (R) | 0 | 1 | 2 | 3 | 4 | 5 |
| Vibrante (Throbbing) (S) | 0 | 1 | 2 | 3 | 4 | 5 |
| Explosivo (Exploding) (S) | 0 | 1 | 2 | 3 | 4 | 5 |
| Placentero (Pleasurable) (A) | 0 | 1 | 2 | 3 | 4 | 5 |
| Creciente (Rising) (S) | 0 | 1 | 2 | 3 | 4 | 5 |
| Efusivo (Spreading) (S) | 0 | 1 | 2 | 3 | 4 | 5 |
| Tembloroso (Trembling) (S) | 0 | 1 | 2 | 3 | 4 | 5 |
| Salvaje (Wild) (S) | 0 | 1 | 2 | 3 | 4 | 5 |

*Note*. A: Affective; S: Sensory; I: Intimacy; R: Reward.
